# Supplementary material for: Research prioritization through prediction of future impact on biomedical science: a position paper on inference-analytics
Source: Gigascience. 2013 Aug 30;2:11. doi: 10.1186/2047-217X-2-11 (PMC3844564; doi:10.1186/2047-217X-2-11)
Supplement: Additional file 8 — Of the top 50 high-impact interactions, those in which one or both proteins are among the GWAS-genes are shown. [file 2047-217X-2-11-S8.xlsx]

## Sheet: supp8-gwas
Rank	Entrez_id(s)	GWAS Disease(s)
1	9370	Adiponectin levels
2	4829	Retinal vascular caliber
3	9688	HDL cholesterol
4	267012	Bipolar disorder and schizophrenia
8	7532	Multiple sclerosis
12	5578	Ventricular conduction,Height
14	2099	Bone mineral density (hip),Height,Alcohol dependence,Sudden cardiac arrest,Bone mineral density (spine),Chronic myeloid leukemia,Breast cancer
15	2099	Bone mineral density (hip),Height,Alcohol dependence,Sudden cardiac arrest,Bone mineral density (spine),Chronic myeloid leukemia,Breast cancer
16	2626, 4776	Retinal vascular caliber; Height
17	5578, 7532	Ventricular conduction,Height; Multiple sclerosis
18	3566	IgE levels
22	4088	Coronary heart disease,Asthma,Crohn's disease
23	5578	Ventricular conduction,Height
24	3575	Type 1 diabetes,Ulcerative colitis,Multiple sclerosis,Primary biliary cirrhosis
28	7532	Multiple sclerosis
31	2099	Bone mineral density (hip),Height,Alcohol dependence,Sudden cardiac arrest,Bone mineral density (spine),Chronic myeloid leukemia,Breast cancer
34	1956, 5578	Glioma; Ventricular conduction,Height
36	19	MRI atrophy measures,HDL cholesterol,Lipid metabolism phenotypes,Cholesterol,total,Coronary heart disease
38	2625, 6304	Hodgkin's lymphoma; Platelet counts
39	367	Prostate cancer,Male-pattern baldness,LDL cholesterol
44	5594	Multiple sclerosis
46	2099	Bone mineral density (hip),Height,Alcohol dependence,Sudden cardiac arrest,Bone mineral density (spine),Chronic myeloid leukemia,Breast cancer
47	6461	Brain structure
50	5443	Type 1 diabetes,Height,Body mass index
58	1956	Glioma
59	3394	Diabetic retinopathy,Chronic lymphocytic leukemia,Multiple sclerosis,Systemic sclerosis
60	1956	Glioma
63	81620	Hematological and biochemical traits
64	4088	Coronary heart disease,Asthma,Crohn's disease
69	23081	Radiation response
71	5594	Multiple sclerosis
72	999	Ulcerative colitis,Colorectal cancer
74	3516	Rheumatoid arthritis
82	2626	Retinal vascular caliber
83	11200	Esophageal cancer and gastric cancer,Vertical cup-disc ratio
86	5894	total,Cardiac hypertrophy,Cholesterol
88	2961	Cognitive test performance
92	81620	Hematological and biochemical traits
97	367	Prostate cancer,Male-pattern baldness,LDL cholesterol
100	472	Response to metformin,Melanoma
