# Supplementary material for: Research prioritization through prediction of future impact on biomedical science: a position paper on inference-analytics
Source: Oxford University Press journal article supplement (doi:10.1186/2047-217x-2-11), 2013-08-30
Supplement: author_comments-madhavi_ganapathiraju_v4.pdf [file author_comments-madhavi_ganapathiraju_v4.pdf]

## **Author's response to reviews**

**Title:** Research prioritization through prediction of future impact on biomedical science: a position paper on Inference-Analytics

### **Authors:**

Madhavi K. Ganapathiraju ([madhavi@pitt.edu](mailto:madhavi@pitt.edu))  
Naoki Orii ([norii@cs.cmu.edu](mailto:norii@cs.cmu.edu))

**Version:** 4 **Date:** 11 July 2013

### **Author's response to reviews:**

Inserted reference for Cytoscape software for the new figure (Figure 2) that we added in previous revision and fixed line-color to be uniform in Figure 1.
