# Supplementary material for: Research prioritization through prediction of future impact on biomedical science: a position paper on inference-analytics
Source: Oxford University Press journal article supplement (doi:10.1186/2047-217x-2-11), 2013-08-30
Supplement: reviewer_report-chaoming_song.pdf [file reviewer_report-chaoming_song.pdf]

## **Reviewer's report**

**Title:** Research Prioritization through prediction of future biomedical impact: a position paper

**Version:** 1 **Date:** 22 April 2013

**Reviewer:** CHAOMING SONG

### **Reviewer's report:**

The manuscript by Ganapathiraju et al. presents a new methodological framework towards understanding the impact of PPI based on large scale citation datasets. Basically the authors provided data analysis on the datasets that offers a global view of biomedical impact. They further offered an inference model and test the predictive power of their algorithm. The manuscript is, in general, well written, technically sound, and interesting.

### **Discretionary Revisions**

My only concern is that the new framework so far is based only on the scientific impact (that is the citation) without involving contexts of the references. Therefore, a high PPI involving many citations might be just a controversial one. Further validations based on semantic analysis have to be addressed somewhere.

**Level of interest:** An article of importance in its field

**Quality of written English:** Acceptable

**Statistical review:** Yes, and I have assessed the statistics in my report.

**Declaration of competing interests:**

no
