# Supplementary material for: Research prioritization through prediction of future impact on biomedical science: a position paper on inference-analytics
Source: Oxford University Press journal article supplement (doi:10.1186/2047-217x-2-11), 2013-08-30
Supplement: reviewer_report-matthias_erwin_futschik_v3.pdf [file reviewer_report-matthias_erwin_futschik_v3.pdf]

## **Reviewer's report**

**Title:** Research prioritization through prediction of future impact on biomedical science: a position paper on inference-analytics

**Version: 2 Date:** 13 June 2013

**Reviewer:** Matthias Erwin Futschik

### **Reviewer's report:**

The authors addressed the concerns that I had in their response. It is not quite clear to me, why the additional analysis is not included in the main manuscripts or supplementary materials, but since their response will also be online, it is ok this way, too.

**Level of interest:** An article of importance in its field

**Quality of written English:** Acceptable

**Statistical review:** No, the manuscript does not need to be seen by a statistician.

### **Declaration of competing interests:**

I declare that I have no competing interests.
